# Supplementary material
Source: PubMed Central journal article supplement (PMC4692325)
Supplement: supp_nsv101_scan-15-085_suppl_data.pdf [file supp_nsv101_scan-15-085_suppl_data.pdf]

**Supplemental Table 1. Additional whole brain results.** Clusters significant at a whole-brain corrected false probability rate of  $p < .05$ . Direction of effects noted. The following contrasts yielded no significant clusters and thus are not included in the table: Emotion x Intensity-Quadratic; Emotion x Intensity-Cubic; Age Group x Intensity-Linear, -Quadratic, -Cubic; Intensity-Quadratic, -Cubic.

**Age Group main effect**

| k   | F <sub>1,42</sub> | x   | y   | z   | Atlas                                             | BA     | Adult vs Adolescent? |
|-----|-------------------|-----|-----|-----|---------------------------------------------------|--------|----------------------|
| 454 | 32.57             | -21 | -11 | 41  | Anterior cingulate/Post- & pre-central Gyrus      | 32, 24 | Adolescent > Adult   |
| 213 | 29.97             | 34  | 36  | 36  | Dorsolateral prefrontal cortex                    | 9, 8   | Adolescent > Adult   |
| 204 | 35.11             | 24  | -74 | 1   | Calcarine gyrus, Posterior cingulate cortex       | 18     | Adolescent > Adult   |
| 172 | 32.73             | -39 | -41 | -21 | Fusiform Gyrus                                    | 20, 37 | Adult > Adolescent   |
| 138 | 22.65             | -54 | 9   | 19  | Inferior frontal gyrus                            | 9, 6   | Adult > Adolescent   |
| 125 | 38.52             | 36  | -86 | 1   | Superior/Middle occipital gyrus                   | 18     | Adult > Adolescent   |
| 122 | 44.15             | -11 | -96 | 6   | Superior/Middle occipital gyrus                   | 17, 18 | Adult > Adolescent   |
| 82  | 29.23             | -24 | -64 | 21  | Middle/Superior occipital gyrus                   | 7      | Adolescent > Adult   |
| 69  | 21.96             | 49  | -6  | -14 | Superior temporal sulcus                          | 21     | Adult > Adolescent   |
| 67  | 24.13             | -39 | -81 | 1   | Middle occipital gyrus                            | 18     | Adult > Adolescent   |
| 62  | 22.12             | -36 | -76 | 21  | Middle occipital gyrus                            | 19     | Adult > Adolescent   |
| 60  | 40.88             | 34  | -81 | 24  | Middle occipital gyrus                            | 19     | Adult > Adolescent   |
| 56  | 23.05             | -16 | -51 | 39  | Superior parietal lobule                          | 7      | Adolescent > Adult   |
| 55  | 27.65             | -6  | -71 | 14  | Calcarine gyrus, Cuneus                           | 18, 30 | Adult > Adolescent   |
| 55  | 23.31             | -24 | 31  | 36  | Dorsolateral prefrontal cortex                    | 8      | Adolescent > Adult   |
| 51  | 29.61             | 34  | -14 | -31 | Fusiform gyrus                                    | 20, 28 | Adolescent > Adult   |
| 49  | 33.63             | -4  | 6   | 44  | Supplementary motor area, Middle cingulate cortex | 32     | Adolescent > Adult   |
| 48  | 26.35             | -44 | -69 | -14 | Fusiform Gyrus, Inferior occipital gyrus          | 19     | Adult > Adolescent   |
| 45  | 23.42             | 16  | -4  | 61  | Dorsal prefrontal cortex                          | 6      | Adolescent > Adult   |
| 41  | 28.37             | 41  | -34 | -14 | Fusiform gyrus                                    | 20     | Adult > Adolescent   |
| 39  | 32.26             | -31 | 41  | 24  | Lateral prefrontal cortex                         | 10     | Adolescent > Adult   |
| 39  | 24.51             | 9   | 14  | 31  | Middle/Anterior cingulate cortex                  | 24, 32 | Adolescent > Adult   |
| 39  | 23.40             | 36  | -11 | 49  | Dorsal prefrontal cortex                          | 6,4    | Adult > Adolescent   |

**Emotion main effect**

| <b>k</b> | <b>F<sub>2,462</sub></b> | <b>x</b> | <b>y</b> | <b>z</b> | <b>Atlas</b>                     | <b>BA</b> | <b><u>Happy vs Fearful vs Angry?</u></b> |
|----------|--------------------------|----------|----------|----------|----------------------------------|-----------|------------------------------------------|
| 1521     | 50.30                    | -21      | -76      | -6       | Inferior/middle occipital gyrus  | 18        | <u>Fearful &gt; Angry &gt; Happy</u>     |
| 779      | 17.27                    | -41      | 9        | 29       | Ventrolateral prefrontal cortex  | 9         | <u>Angry &gt; Fearful &gt; Happy</u>     |
| 248      | 16.28                    | 44       | -34      | -14      | Inferior temporal/Fusiform gyrus | 37        | <u>Angry &gt; Fearful &gt; Happy</u>     |
| 180      | 12.06                    | 44       | 19       | 24       | Ventrolateral prefrontal cortex  | 45, 46    | <u>Angry &gt; Fearful &gt; Happy</u>     |
| 152      | 12.55                    | 24       | -84      | -9       | Inferior/middle occipital gyrus  | 18        | <u>Fearful &gt; Angry &gt; Happy</u>     |
| 120      | 20.46                    | -46      | -19      | 41       | Postcentral gyrus                | 3, 4      | <u>Angry &gt; Fearful &gt; Happy</u>     |
| 81       | 14.28                    | 16       | -74      | -6       | Lingual gyrus                    | 18        | <u>Happy &gt; Fearful &gt; Angry</u>     |
| 70       | 14.35                    | 44       | -41      | 14       | Superior temporal sulcus         | 13        | <u>Fearful &gt; Angry &gt; Happy</u>     |
| 70       | 11.46                    | 51       | -39      | 44       | Inferior parietal lobule         | 40        | <u>Happy &gt; Angry &gt; Fearful</u>     |
| 55       | 9.79                     | 14       | -61      | 29       | Precuneus                        | 7         | <u>Fearful &gt; Angry &gt; Happy</u>     |
| 44       | 9.86                     | 39       | 1        | 34       | Lateral prefrontal cortex        | 6         | <u>Angry &gt; Fearful &gt; Happy</u>     |
| 40       | 9.08                     | -6       | 19       | 41       | Medial prefrontal cortex         | 32        | <u>Angry &gt; Fearful &gt; Happy</u>     |

**Intensity-Linear**

| <b>k</b> | <b>F<sub>1,462</sub></b> | <b>x</b> | <b>y</b> | <b>z</b> | <b>Atlas</b>          | <b>BA</b> | <b><u>Direction of Relationship?</u></b> |
|----------|--------------------------|----------|----------|----------|-----------------------|-----------|------------------------------------------|
| 59       | 17.34                    | -44      | -24      | 54       | Pre/postcentral gyrus | 4, 3      | <u>Negative</u>                          |

**Emotion x Intensity-Linear**

| <b>k</b> | <b>F<sub>2,462</sub></b> | <b>x</b> | <b>y</b> | <b>z</b> | <b>Atlas</b>           | <b>BA</b> | <b><u>Strength of Linear Relationship by Emotion?</u></b> |
|----------|--------------------------|----------|----------|----------|------------------------|-----------|-----------------------------------------------------------|
| 67       | 14.14                    | -19      | -76      | -6       | Lingual/Fusiform gyrus | 18        | <u>Fearful &gt; Angry &gt; Happy</u>                      |

**Supplemental Table 2. Additional results from bilateral amygdalae linear mixed effects ROI analysis. Significant effects ( $p < .05$ ) in bold.**

|                                           | <b>F</b>    | <b>df</b>     | <b>p</b>     |
|-------------------------------------------|-------------|---------------|--------------|
| Intercept                                 | 14.39       | 1, 462        | <.001        |
| Emotion                                   | 0.47        | 2, 462        | 0.623        |
| Age Group                                 | 0.42        | 1, 42         | 0.518        |
| Intensity-Linear                          | 2.17        | 1, 462        | 0.141        |
| Intensity-Quadratic                       | 0.02        | 1, 462        | 0.881        |
| Intensity-Cubic                           | 2.94        | 1, 462        | 0.087        |
| Age Group x Emotion                       | 0.87        | 2, 462        | 0.419        |
| Age Group x Intensity-Linear              | 1.09        | 1, 462        | 0.297        |
| Age Group x Intensity-Quadratic           | 1.21        | 1, 462        | 0.272        |
| Age Group x Intensity-Cubic               | 0.14        | 1, 462        | 0.713        |
| Emotion x Intensity-Linear                | 1.12        | 2, 462        | 0.328        |
| Emotion x Intensity-Quadratic             | 0.65        | 2, 462        | 0.525        |
| <b>Emotion x Intensity-Cubic</b>          | <b>4.72</b> | <b>2, 462</b> | <b>0.009</b> |
| Age Group x Emotion x Intensity-Linear    | 0.66        | 2, 462        | 0.519        |
| Age Group x Emotion x Intensity-Quadratic | 0.24        | 2, 462        | 0.783        |
| Age Group x Emotion x Intensity-Cubic     | 2.05        | 2, 462        | 0.130        |

## Supplemental Results

### Age as a Continuous Variable

Separating the participants into two groups, adolescents and adults, allows us to be consistent with, and facilitate comparisons with, many prior papers that used this dichotomous variable approach (e.g., Grill-Spector *et al.*, 2008; Thomas *et al.*, 2011; Somerville *et al.*, 2013). Additionally, the dichotomous approach is more appropriate for our data because there were relatively fewer participants at the oldest end of the scale; using a dichotomous approach limits the influence these few oldest participants have on the analysis.

Nevertheless, we reran the analyses with age as a continuous variable. At a lower threshold, the clusters from the Age Group x Emotion x Intensity-Quadratic main finding were still identified: superior temporal sulcus ( $xyz = -44, -29, 4$ ;  $F_{2,462} = 7.58$ ,  $p < .05$  uncorrected), ventrolateral prefrontal cortex ( $xyz = -46, 24, -1$ ;  $F_{2,462} = 4.33$ ,  $p < .05$  uncorrected), middle temporal gyrus ( $xyz = -56, -59, 14$ ;  $F_{2,462} = 4.75$ ,  $p < .05$  uncorrected). Additionally, the clusters from the Age Group x Emotion finding were still identified when age was used as a continuous variable: inferior/middle occipital gyrus ( $xyz = -21, -91, -4$ ;  $F_{1,462} = 8.31$ ,  $p < .05$  uncorrected) and inferior parietal lobule ( $xyz = 51, -51, 44$ ;  $F_{1,462} = 4.16$ ,  $p < .05$  uncorrected). As noted above, these attenuated effects may be due to the few participants on the oldest end of the scale (i.e., only two participants over 40 years old), who may have had a disproportionate influence on the dimensional analysis.
